# Supplementary material
Source: Springer Nature journal article supplement (https://www.springermedizin.de/resource/supplementary/12911_2012_584_MOESM12_ESM.pdf/9525850)

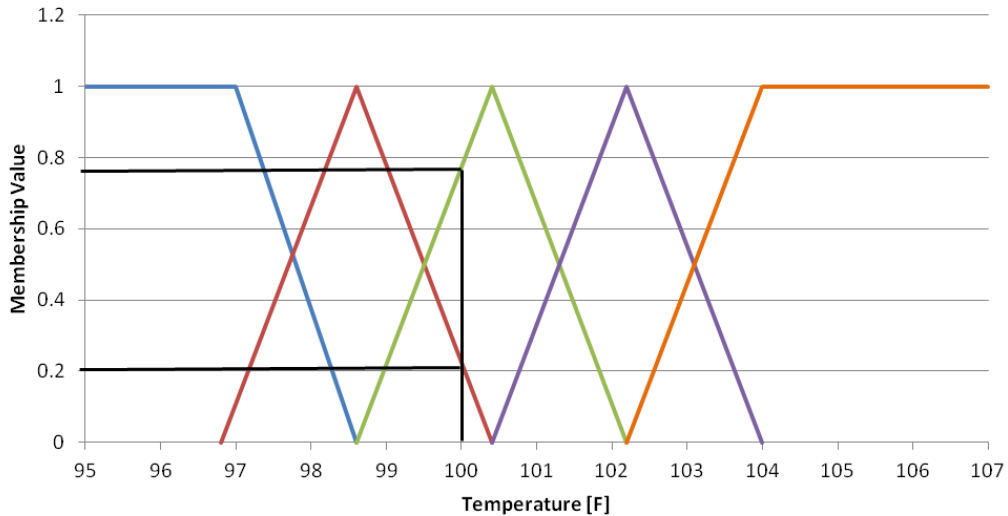

— Low    — Normal    — Fever    — Strong Fever    — Hyperthermia

Supplement: MOESM12 [file 9525850]
